# Supplementary material for: Genotypic and Phenotypic Structure of the Population of Phytophthora infestans in Egypt Revealed the Presence of European Genotypes
Source: MDPI journal article supplement (doi:10.3390/jof8050468), 2022-04-30
Supplement: s1 [file s1]

Supplementary data

# Genotypic and phenotypic structure of the population of *Phytophthora infestans* in Egypt revealed the presence of European genotypes

Sherif Mohamed El-Ganainy<sup>1,2\*</sup>, Zafar Iqbal<sup>3</sup>, Hossam Mohamed Awad<sup>4</sup>, Muhammad Naeem Sattar<sup>3</sup>, Abdel Mohsen Tohamy<sup>2</sup>, Ahmed O. Abbas<sup>5</sup>, Julie Squires<sup>6</sup> and David E L Cooke<sup>6\*</sup>

<sup>1</sup>Department of Arid Land Agriculture, College of Agriculture and Food Sciences, King Faisal University, P.O. Box 420, Al-Ahsa 31982, Saudi Arabia; salganainy@kfu.edu.sa (S.M.E.-G.);

<sup>2</sup>Vegetable Diseases Research Department, Plant Pathology Research Institute, ARC, Giza 12619, Egypt; tohamy12@hotmail.com (A.M.T.)

<sup>3</sup>Central laboratories, King Faisal University, Saudi Arabia. mnsattar@kfu.edu.sa (M.N.S.); zafar@kfu.edu.sa (Z.I.)

<sup>4</sup>Agriculture Botany Department, Menofia University, Shibin El-Kom, Egypt; Hosamawad80@yahoo.com (H.M.A.)

<sup>5</sup>Department of Animal and Fish Production, College of Agricultural and Food Sciences, King Faisal University, P.O. Box 420, Al-Ahsa 31982, Saudi Arabia; aabbas@kfu.edu.sa (A.O.A.)

<sup>6</sup>The James Hutton Institute, Dundee, Scotland, U.K; david.cooke@hutton.ac.uk (D.E.C.), julie.squires@hutton.ac.uk (J.S.)

\*Correspondence: salganainy@kfu.edu.sa (S.M.E.-G.); david.cooke@hutton.ac.uk (D.E.C.)

**Table S1.** Differential set of *Solanum demissum* used in the study

| Clone  | Known R gene   | Identity          |
|--------|----------------|-------------------|
| Ma R1  | R1             | CEBECO 43154-5    |
| Ma R2  | R2             | CEBECO 44158-4    |
| Ma R3  | R3a, R3b       | CEBECO 4642-1     |
| Ma R4  | R4             | CEBECO 4431-5     |
| Ma R5  | R5             | Black 3053-18     |
| Ma R6  | R6             | Black XD2-21      |
| Ma R7  | R7             | Black 2182 ef (7) |
| Ma R8  | R8             | Black 2424 a (5)  |
| Ma R9  | R9 or R1R2R3R9 | Black 2573 (2)    |
| Ma R10 | R10            | Black 3681 ad (1) |
| Ma R11 | R11            | Black 5008 ab (6) |

**Table S2.** Primer list for the 12-Plex assay used in the current study.

| SSR locus       | Dye | Product size range (bp) | Primer sequence (5'-3')                                         |
|-----------------|-----|-------------------------|-----------------------------------------------------------------|
| G11             | NED | 115-210                 | Fwd-TGCTATTTATCAAGCGTGGG<br>Rev-GTTTCAATCTGCAGCCGTAAGA          |
| PinfSSR3 (Pi02) | NED | 255-275                 | Fwd-NED-ACCTGCAGAACTACCGCCC<br>Rev-GTTTGACCACTTTCCTCGGTTC       |
| PinfSSR11       | NED | 325-360                 | Fwd -NED-TTAAGCCACGACATGAGCTG<br>Rev-GTTTAGACAATTGTTTTGTGGTCGC  |
| D13             | FAM | 100-210                 | Fwd-FAM-TGCCCCCTGCTCACTC<br>Rev-GCTCGAATTCATTTTACAGACTTG        |
| PinfSSR8        | FAM | 240-255                 | Fwd-FAM-AATCTGATCGCAACTGAGGG<br>Rev-GTTTACAAGATACACACGTCGCTCC   |
| PinfSSR4        | FAM | 280-305                 | Fwd-FAM-TCTTGTTGAGTATGCGACG<br>Rev-GTTTCACTTCGGGAGAAAGGCTTC     |
| Pi04            | VIC | 155-175                 | Fwd-VIC-AGCGGCTTACCGATGG<br>Rev-GTTTCAGCGGCTGTTTCGAC            |
| Pi70            | VIC | 185-205                 | Fwd-VIC-ATGAAAATACGTCAATGCTCG<br>Rev-CGTTGGATATTCTATTTCTTCG     |
| PinfSSR6        | VIC | 230-250                 | Fwd-GTTTTGGTGGGGCTGAAGTTTT<br>Rev-VIC - TCGCCACAAGATTTATTCCG    |
| Pi63            | VIC | 265-280                 | FwdVIC – ATGACGAAGATGAAAGTGAGG<br>Rev-CGTATTTTCCTGTTTATCTAACACC |
| PinfSSR2        | PET | 165-180                 | FwdPET-CGACTTCTACATCAACCGGC<br>Rev-GTTTGCTTGGACTGCGTCTTTAGC     |
| Pi4B            | PET | 200-295                 | FwdPET – AAAATAAAGCCTTTGGTTCA<br>Rev-GCAAGCGAGGTTTGTAGATT       |

**Table S3.** Euroblight Sample sheet

| Country ID | User Init | Surveyor Name           | Institution Name                   | Reference Number/Name | Host Genus ID | Obs Year | Month | Day | Location Name       | Latitude | Longitude | Survey Site ID | Host Cultivar Name | Growth Stage ID | Severity |
|------------|-----------|-------------------------|------------------------------------|-----------------------|---------------|----------|-------|-----|---------------------|----------|-----------|----------------|--------------------|-----------------|----------|
| EG         | SGA       | Sherif El-Ganainy (SEG) | Plant Pathology Research Institute | EG-001                | 1             | 2010     | 1     | 5   | Nobareyah           | 30.6436  | 30.1510   | 1              | Hermes             | 10              | 4        |
| EG         | SGA       | SEG                     | PPRI                               | EG-002                | 1             | 2010     | 1     | 7   | Tamalay             | 30.5112  | 30.8367   | 1              | Spunta             | 31              | 6        |
| EG         | SGA       | SEG                     | PPRI                               | EG-003                | 1             | 2010     | 1     | 7   | Minuf               | 30.4677  | 30.9241   | 1              | Agria              | 39              | 11       |
| EG         | SGA       | SEG                     | PPRI                               | EG-004                | 1             | 2010     | 1     | 7   | Minuf               | 30.4829  | 30.9192   | 1              | Lady Rosetta       | 39              | 9        |
| EG         | SGA       | SEG                     | PPRI                               | EG-005                | 1             | 2010     | 1     | 12  | Tamalay             | 30.5015  | 30.8596   | 1              | Diamant            | 10              | 11       |
| EG         | SGA       | SEG                     | PPRI                               | EG-006                | 1             | 2010     | 1     | 20  | Al Qanater          | 30.1867  | 31.1313   | 1              | Nicola             | 39              | 2        |
| EG         | SGA       | SEG                     | PPRI                               | EG-007                | 1             | 2010     | 1     | 25  | Al-Busayli          | 31.3289  | 30.4069   | 1              | Spunta             | 31              | 7        |
| EG         | SGA       | SEG                     | PPRI                               | EG-008                | 1             | 2010     | 1     | 27  | Minuf               | 30.4511  | 30.9285   | 1              | Bellini            | 39              | 5        |
| EG         | SGA       | SEG                     | PPRI                               | EG-009                | 1             | 2010     | 2     | 1   | Al Tawfikeya        | 30.6090  | 30.7677   | 1              | Slaney             | 33              | 4        |
| EG         | SGA       | SEG                     | PPRI                               | EG-010                | 1             | 2010     | 2     | 3   | Minuf               | 30.4435  | 30.9257   | 1              | Lady Rosetta       | 39              | 6        |
| EG         | SGA       | SEG                     | PPRI                               | EG-011                | 1             | 2010     | 2     | 5   | Tamalay             | 30.4967  | 30.8560   | 1              | Spunta             | 33              | 5        |
| EG         | SGA       | SEG                     | PPRI                               | EG-012                | 1             | 2010     | 2     | 12  | El-Mahalla El-Kubra | 30.9388  | 31.1202   | 1              | Cara               | 65              | 5        |
| EG         | SGA       | SEG                     | PPRI                               | EG-013                | 1             | 2010     | 2     | 26  | Minuf               | 30.4667  | 30.9443   | 1              | Burren             | 67              | 7        |
| EG         | SGA       | SEG                     | PPRI                               | EG-014                | 1             | 2010     | 3     | 5   | Al-Busayli          | 31.3277  | 30.4025   | 1              | Slaney             | 39              | 10       |
| EG         | SGA       | SEG                     | PPRI                               | EG-015                | 1             | 2010     | 3     | 23  | Shirbin             | 31.2134  | 31.5308   | 1              | Sante              | 65              | 9        |
| EG         | SGA       | SEG                     | PPRI                               | EG-016                | 2             | 2010     | 4     | 15  | Qelyoub             | 30.1639  | 31.2030   | 1              | Super Strain B     | 67              | 6        |
| EG         | SGA       | SEG                     | PPRI                               | EG-017                | 1             | 2010     | 12    | 10  | kom hamada          | 30.7192  | 30.7324   | 1              | Bellini            | 31              | 3        |
| EG         | SGA       | SEG                     | PPRI                               | EG-018                | 1             | 2010     | 12    | 17  | Elbostan            | 30.7951  | 30.4798   | 1              | Inova              | 33              | 2        |
| EG         | SGA       | SEG                     | PPRI                               | EG-019                | 1             | 2011     | 1     | 3   | Tamalay             | 30.4941  | 30.8449   | 1              | Diamant            | 15              | 11       |
| EG         | SGA       | SEG                     | PPRI                               | EG-020                | 1             | 2011     | 1     | 4   | Minuf               | 30.4631  | 30.9459   | 1              | Agria              | 67              | 11       |
| EG         | SGA       | SEG                     | PPRI                               | EG-021                | 1             | 2011     | 1     | 4   | Minuf               | 30.4632  | 30.9491   | 1              | Lady Rosetta       | 69              | 11       |
| EG         | SGA       | SEG                     | PPRI                               | EG-022                | 1             | 2011     | 1     | 7   | Tamalay             | 30.4965  | 30.8480   | 1              | Spunta             | 63              | 9        |
| EG         | SGA       | SEG                     | PPRI                               | EG-023                | 1             | 2011     | 1     | 7   | Tamalay             | 30.4978  | 30.8459   | 1              | Diamant            | 65              | 4        |

|    |     |     |      |        |   |      |   |    |                        |         |         |   |                 |    |    |
|----|-----|-----|------|--------|---|------|---|----|------------------------|---------|---------|---|-----------------|----|----|
| EG | SGA | SEG | PPRI | EG-024 | 1 | 2011 | 1 | 12 | El-Mahalla<br>El-Kubra | 31.0006 | 31.1522 | 1 | Cara            | 25 | 4  |
| EG | SGA | SEG | PPRI | EG-025 | 1 | 2011 | 1 | 19 | Minuf                  | 30.4479 | 30.9297 | 1 | Lady<br>Rosetta | 63 | 11 |
| EG | SGA | SEG | PPRI | EG-026 | 1 | 2011 | 1 | 19 | Minuf                  | 30.4292 | 30.9335 | 1 | Provento        | 51 | 4  |
| EG | SGA | SEG | PPRI | EG-027 | 1 | 2011 | 1 | 19 | Minuf                  | 30.4510 | 30.9249 | 1 | Agria           | 69 | 11 |
| EG | SGA | SEG | PPRI | EG-028 | 1 | 2011 | 1 | 20 | Tamalay                | 30.5199 | 30.8637 | 1 | Diamant         | 15 | 9  |
| EG | SGA | SEG | PPRI | EG-031 | 1 | 2011 | 1 | 22 | Barheem                | 30.4561 | 30.8901 | 1 | Diamant         | 69 | 10 |
| EG | SGA | SEG | PPRI | EG-032 | 1 | 2011 | 1 | 22 | Teta                   | 30.5114 | 30.9129 | 1 | Lady<br>Rosetta | 69 | 11 |
| EG | SGA | SEG | PPRI | EG-034 | 1 | 2011 | 1 | 29 | kom<br>hamada          | 30.7592 | 30.6822 | 1 | Accent          | 21 | 2  |
| EG | SGA | SEG | PPRI | EG-036 | 1 | 2011 | 2 | 10 | Minuf                  | 30.4750 | 30.9330 | 1 | Lady<br>Rosetta | 67 | 9  |
| EG | SGA | SEG | PPRI | EG-037 | 1 | 2011 | 2 | 11 | Tamalay                | 30.5110 | 30.8392 | 1 | Agria           | 69 | 11 |
| EG | SGA | SEG | PPRI | EG-038 | 1 | 2011 | 2 | 11 | Tamalay                | 30.5107 | 30.8395 | 1 | Spunta          | 25 | 2  |
| EG | SGA | SEG | PPRI | EG-039 | 1 | 2011 | 2 | 11 | Tamalay                | 30.5109 | 30.8422 | 1 | Spunta          | 25 | 3  |
| EG | SGA | SEG | PPRI | EG-040 | 1 | 2011 | 2 | 15 | Minuf                  | 30.4740 | 30.9334 | 1 | Diamant         | 25 | 2  |
| EG | SGA | SEG | PPRI | EG-041 | 1 | 2011 | 2 | 16 | Tamalay                | 30.4924 | 30.8453 | 1 | Spunta          | 25 | 6  |
| EG | SGA | SEG | PPRI | EG-043 | 1 | 2011 | 2 | 16 | Tamalay                | 30.4950 | 30.8446 | 1 | Spunta          | 25 | 4  |
| EG | SGA | SEG | PPRI | EG-044 | 1 | 2011 | 2 | 16 | Tamalay                | 30.4967 | 30.8458 | 1 | Spunta          | 25 | 4  |
| EG | SGA | SEG | PPRI | EG-045 | 1 | 2011 | 2 | 16 | Tamalay                | 30.4894 | 30.8679 | 1 | Spunta          | 25 | 5  |
| EG | SGA | SEG | PPRI | EG-046 | 1 | 2011 | 2 | 16 | Minuf                  | 30.4727 | 30.4727 | 1 | Lady<br>Rosetta | 25 | 2  |
| EG | SGA | SEG | PPRI | EG-047 | 1 | 2011 | 2 | 16 | Tamalay                | 30.4990 | 30.8603 | 1 | Diamant         | 67 | 9  |
| EG | SGA | SEG | PPRI | EG-049 | 1 | 2011 | 2 | 16 | Tamalay                | 30.5170 | 30.8418 | 1 | Hermes          | 15 | 2  |
| EG | SGA | SEG | PPRI | EG-050 | 1 | 2011 | 2 | 16 | Menouf                 | 30.4823 | 30.9059 | 1 | Diamant         | 21 | 2  |
| EG | SGA | SEG | PPRI | EG-051 | 1 | 2011 | 2 | 21 | Nader                  | 30.5284 | 30.8498 | 1 | Spunta          | 25 | 3  |
| EG | SGA | SEG | PPRI | EG-052 | 1 | 2011 | 2 | 23 | Menouf                 | 30.4574 | 30.9181 | 1 | Lady<br>Rosetta | 21 | 2  |
| EG | SGA | SEG | PPRI | EG-054 | 1 | 2011 | 2 | 23 | Gazi                   | 30.4578 | 30.8549 | 1 | Spunta          | 21 | 2  |
| EG | SGA | SEG | PPRI | EG-055 | 1 | 2011 | 2 | 23 | Minuf                  | 30.4592 | 30.9448 | 1 | Lady<br>Rosetta | 30 | 4  |
| EG | SGA | SEG | PPRI | EG-056 | 1 | 2011 | 2 | 23 | Minuf                  | 30.4588 | 30.9464 | 1 | Lady<br>Rosetta | 21 | 4  |
| EG | SGA | SEG | PPRI | EG-057 | 1 | 2011 | 2 | 23 | Minuf                  | 30.4595 | 30.9502 | 1 | Lady<br>Rosetta | 21 | 4  |

|    |     |     |      |        |   |      |   |    |                     |         |         |   |              |    |    |
|----|-----|-----|------|--------|---|------|---|----|---------------------|---------|---------|---|--------------|----|----|
| EG | SGA | SEG | PPRI | EG-058 | 1 | 2011 | 2 | 23 | Minuf               | 30.4591 | 30.9515 | 1 | Lady Rosetta | 30 | 4  |
| EG | SGA | SEG | PPRI | EG-059 | 1 | 2011 | 2 | 26 | Alqam               | 30.5410 | 30.8264 | 1 | Agria        | 35 | 5  |
| EG | SGA | SEG | PPRI | EG-060 | 1 | 2011 | 2 | 27 | Minuf               | 30.4885 | 30.9101 | 1 | Diamant      | 21 | 2  |
| EG | SGA | SEG | PPRI | EG-061 | 1 | 2011 | 2 | 27 | Minuf               | 30.4822 | 30.9295 | 1 | Diamant      | 21 | 2  |
| EG | SGA | SEG | PPRI | EG-062 | 1 | 2011 | 2 | 27 | Minuf               | 30.4824 | 30.9325 | 1 | Diamant      | 21 | 2  |
| EG | SGA | SEG | PPRI | EG-063 | 1 | 2011 | 2 | 27 | Minuf               | 30.4814 | 30.9346 | 1 | Diamant      | 21 | 2  |
| EG | SGA | SEG | PPRI | EG-064 | 1 | 2011 | 2 | 27 | Minuf               | 30.4815 | 30.9362 | 1 | Diamant      | 21 | 2  |
| EG | SGA | SEG | PPRI | EG-065 | 1 | 2011 | 2 | 27 | Minuf               | 30.4799 | 30.9380 | 1 | Diamant      | 21 | 2  |
| EG | SGA | SEG | PPRI | EG-067 | 1 | 2011 | 3 | 5  | Nader               | 30.5260 | 30.8519 | 1 | Spunta       | 25 | 2  |
| EG | SGA | SEG | PPRI | EG-068 | 1 | 2011 | 3 | 6  | Minuf               | 30.4397 | 30.9219 | 1 | Lady Rosetta | 30 | 2  |
| EG | SGA | SEG | PPRI | EG-069 | 1 | 2011 | 3 | 6  | Minuf               | 30.4379 | 30.9219 | 1 | Lady Rosetta | 30 | 2  |
| EG | SGA | SEG | PPRI | EG-070 | 1 | 2011 | 3 | 6  | Fisha               | 30.3999 | 30.9430 | 1 | Draga        | 39 | 2  |
| EG | SGA | SEG | PPRI | EG-072 | 1 | 2011 | 3 | 15 | Minuf               | 30.4726 | 30.9454 | 1 | Lady Rosetta | 59 | 8  |
| EG | SGA | SEG | PPRI | EG-073 | 1 | 2011 | 3 | 15 | Minuf               | 30.4731 | 30.9474 | 1 | Agria        | 67 | 11 |
| EG | SGA | SEG | PPRI | EG-074 | 1 | 2011 | 3 | 16 | Kamshoush           | 30.4174 | 30.9362 | 1 | Spunta       | 59 | 7  |
| EG | SGA | SEG | PPRI | EG-075 | 1 | 2011 | 3 | 16 | El-Hamoul           | 30.4811 | 30.9674 | 1 | Diamant      | 59 | 7  |
| EG | SGA | SEG | PPRI | EG-076 | 1 | 2011 | 3 | 25 | El-Bostan           | 30.8010 | 30.4771 | 1 | Inova        | 39 | 3  |
| EG | SGA | SEG | PPRI | EG-077 | 1 | 2011 | 3 | 25 | El-Bostan           | 30.7882 | 30.4887 | 1 | Princess     | 39 | 3  |
| EG | SGA | SEG | PPRI | EG-078 | 1 | 2011 | 3 | 30 | Minuf               | 30.4432 | 30.9312 | 1 | Agria        | 67 | 11 |
| EG | SGA | SEG | PPRI | EG-079 | 1 | 2011 | 4 | 5  | Minuf               | 30.4491 | 30.9316 | 1 | Diamant      | 63 | 8  |
| EG | SGA | SEG | PPRI | EG-080 | 1 | 2011 | 4 | 5  | El-Hamoul           | 30.4822 | 30.9610 | 1 | Diamant      | 59 | 8  |
| EG | SGA | SEG | PPRI | EG-081 | 1 | 2011 | 4 | 6  | Kamshoush           | 30.4260 | 30.9349 | 1 | Mondial      | 59 | 3  |
| EG | SGA | SEG | PPRI | EG-082 | 1 | 2011 | 4 | 10 | Tamalay             | 30.5204 | 30.8513 | 1 | Burren       | 63 | 2  |
| EG | SGA | SEG | PPRI | EG-083 | 1 | 2011 | 4 | 15 | Shanshour           | 30.3615 | 30.9970 | 1 | Spunta       | 59 | 7  |
| EG | SGA | SEG | PPRI | EG-084 | 1 | 2011 | 4 | 25 | Tamalay             | 30.4819 | 30.8377 | 1 | Spunta       | 59 | 7  |
| EG | SGA | SEG | PPRI | EG-085 | 1 | 2011 | 4 | 25 | Tamalay             | 30.4841 | 30.8372 | 1 | Agria        | 69 | 11 |
| EG | SGA | SEG | PPRI | EG-086 | 1 | 2011 | 4 | 25 | Tamalay             | 30.4925 | 30.8343 | 1 | Diamant      | 59 | 6  |
| EG | SGA | SEG | PPRI | EG-087 | 1 | 2011 | 4 | 26 | Minuf               | 30.4459 | 30.9214 | 1 | Lady Rosetta | 63 | 8  |
| EG | SGA | SEG | PPRI | EG-088 | 1 | 2011 | 4 | 28 | Tamalay             | 30.4997 | 30.8326 | 1 | Spunta       | 59 | 10 |
| EG | SGA | SEG | PPRI | EG-089 | 2 | 2012 | 3 | 25 | Sakha               | 31.0929 | 30.9503 | 1 | GS12         | 59 | 5  |
| EG | SGA | SEG | PPRI | EG-090 | 1 | 2012 | 4 | 8  | El-Mahalla El-Kubra | 30.9891 | 31.1214 | 1 | Cara         | 67 | 6  |

|    |     |     |      |        |   |      |   |    |                        |         |         |   |        |    |    |
|----|-----|-----|------|--------|---|------|---|----|------------------------|---------|---------|---|--------|----|----|
| EG | SGA | SEG | PPRI | EG-091 | 1 | 2012 | 4 | 20 | Sakha                  | 31.0944 | 30.9546 | 1 | Spunta | 67 | 10 |
| EG | SGA | SEG | PPRI | EG-092 | 1 | 2012 | 5 | 2  | El-Mahalla<br>El-Kubra | 31.0116 | 31.1145 | 1 | Cara   | 67 | 5  |
| EG | SGA | SEG | PPRI | EG-093 | 1 | 2012 | 5 | 2  | El-Mahalla<br>El-Kubra | 31.0143 | 31.1025 | 1 | Cara   | 67 | 5  |
| EG | SGA | SEG | PPRI | EG-094 | 1 | 2012 | 5 | 2  | El-Mahalla<br>El-Kubra | 30.9356 | 31.1094 | 1 | Cara   | 67 | 5  |
| EG | SGA | SEG | PPRI | EG-095 | 2 | 2012 | 5 | 10 | Sakha                  | 31.0836 | 30.9424 | 1 | GS12   | 63 | 10 |
| EG | SGA | SEG | PPRI | EG-096 | 1 | 2012 | 5 | 16 | El-Mahalla<br>El-Kubra | 30.9215 | 31.0857 | 1 | Cara   | 67 | 6  |

**Table S4. SSR table**

|                |                 |             |              | All<br>ele<br>1 | All<br>ele<br>2 | All<br>ele<br>3 | Alle<br>le 1 | Alle<br>le 2  | All<br>ele<br>1 | All<br>ele<br>2 | All<br>ele<br>1 | All<br>ele<br>2 | All<br>ele<br>3 | All<br>ele<br>1 | All<br>ele<br>2 | All<br>ele<br>3 | All<br>ele<br>1 | All<br>ele<br>2 | All<br>ele<br>3 |          |
|----------------|-----------------|-------------|--------------|-----------------|-----------------|-----------------|-----------------|-----------------|-----------------|-----------------|-----------------|-----------------|-----------------|-----------------|-----------------|-----------------|-----------------|-----------------|-----------------|-----------------|-----------------|--------------|---------------|-----------------|-----------------|-----------------|-----------------|-----------------|-----------------|-----------------|-----------------|-----------------|-----------------|-----------------|----------|
| sample<br>name | Isolate<br>name | Cou<br>ntry | Gen<br>otype | Pi<br>02        | Pi<br>02        | Pi<br>02        | Pi<br>4<br>B    | Pi<br>4<br>B    | Pi<br>4<br>B    | G<br>11         | G<br>11         | G<br>11         | Pi<br>04        | Pi<br>04        | Pi<br>63        | Pi<br>63        | Pi<br>63        | Pi<br>70        | Pi<br>70        | D<br>13         | D<br>13         | D<br>13      | SS<br>R1<br>1 | SS<br>R1<br>1   | SS<br>R2        | SS<br>R2        | SS<br>R4        | SS<br>R4        | SS<br>R4        | SS<br>R6        | SS<br>R6        | SS<br>R6        | SS<br>R8        | SS<br>R8        | SS<br>R8 |
| 09_7110A       | C3              | UK          | 13_A<br>2_1  | 26<br>6         | 26<br>8         | 0               | 20<br>5         | 21<br>3         | 0               | 15<br>4         | 16<br>0         | 0               | 16<br>6         | 17<br>0         | 27<br>3         | 27<br>9         | 0               | 19<br>2         | 19<br>2         | 13<br>6         | 15<br>4         | 0            | 341           | 341             | 17<br>3         | 17<br>3         | 28<br>4         | 29<br>4         | 0               | 24<br>0         | 24<br>4         | 0               | 26<br>0         | 26<br>6         | 0        |
| 09_7126A       | C_4             | UK          | 6_A1         | 25<br>8         | 26<br>6         | 26<br>8         | 21<br>3         | 21<br>7         | 0               | 16<br>0         | 16<br>0         | 0               | 16<br>6         | 17<br>0         | 27<br>3         | 27<br>9         | 0               | 19<br>2         | 19<br>5         | nu<br>ll        | nu<br>ll        | 0            | 341           | 355             | 17<br>3         | 17<br>5         | 28<br>4         | 29<br>2         | 29<br>6         | 24<br>4         | 24<br>4         | 0               | 26<br>0         | 26<br>6         | 0        |
| 09_7186A       | C_5             | UK          | 13_A<br>2_2  | 26<br>6         | 26<br>8         | 0               | 20<br>5         | 21<br>3         | 0               | 15<br>4         | 16<br>0         | 0               | 16<br>6         | 17<br>0         | 27<br>3         | 27<br>9         | 0               | 19<br>2         | 19<br>2         | 13<br>6         | 14<br>4         | 15<br>4      | 341           | 341             | 17<br>3         | 17<br>3         | 28<br>4         | 29<br>4         | 0               | 24<br>0         | 24<br>4         | 0               | 26<br>0         | 26<br>6         | 0        |
| 09_7262A       | C_6             | UK          | 8_2_<br>A1   | 26<br>8         | 26<br>8         | 0               | 20<br>5         | 21<br>7         | 0               | 16<br>6         | 16<br>6         | 0               | 16<br>6         | 17<br>0         | 27<br>3         | 27<br>9         | 0               | 19<br>2         | 19<br>2         | 11<br>8         | 13<br>6         | 0            | 331           | 341             | 17<br>3         | 17<br>5         | 28<br>8         | 29<br>4         | 0               | 24<br>2         | 24<br>4         | 0               | 26<br>0         | 26<br>6         | 0        |
| 09_7410A       | C_7             | UK          | 13_A<br>2_5  | 26<br>6         | 26<br>8         | 0               | 20<br>5         | 21<br>3         | 0               | 15<br>4         | 16<br>0         | 16<br>4         | 16<br>6         | 17<br>0         | 27<br>3         | 27<br>9         | 0               | 19<br>2         | 19<br>2         | 13<br>6         | 15<br>4         | 0            | 341           | 341             | 17<br>3         | 17<br>3         | 28<br>4         | 29<br>4         | 0               | 24<br>0         | 24<br>4         | 0               | 26<br>0         | 26<br>6         | 0        |
| 09_7610A       | C_8             | UK          | 13_A<br>2_23 | 26<br>6         | 26<br>8         | 0               | 20<br>5         | 21<br>3         | 0               | 15<br>4         | 16<br>0         | 0               | 16<br>6         | 17<br>0         | 27<br>3         | 27<br>9         | 0               | 19<br>2         | 19<br>2         | 13<br>6         | 15<br>4         | 0            | 341           | 341             | 17<br>3         | 17<br>3         | 28<br>4         | 29<br>4         | 0               | 24<br>0         | 24<br>4         | 0               | 26<br>0         | 26<br>6         | 0        |
| 09_7710A       | C_9             | UK          | 23_A<br>1_3  | 26<br>6         | 26<br>8         | 0               | 21<br>3         | 21<br>7         | 0               | 14<br>2         | 15<br>6         | 20<br>6         | 17<br>0         | 17<br>0         | 27<br>0         | 27<br>9         | 0               | 19<br>2         | 19<br>2         | 13<br>6         | 21<br>0         | 0            | 331           | 341             | 17<br>3         | 17<br>5         | 28<br>8         | 29<br>4         | 29<br>6         | 22<br>0         | 22<br>0         | 0               | 26<br>0         | 26<br>6         | 0        |
| 09_7722B       | C_1<br>0        | UK          | 23_A<br>1_4  | 26<br>6         | 26<br>8         | 27<br>0         | 21<br>3         | 21<br>7         | 0               | 14<br>2         | 15<br>6         | 20<br>6         | 17<br>0         | 17<br>0         | 27<br>0         | 27<br>9         | 0               | 19<br>2         | 19<br>2         | 13<br>6         | 21<br>0         | 0            | 331           | 341             | 17<br>3         | 17<br>5         | 28<br>8         | 29<br>4         | 0               | 24<br>4         | 24<br>4         | 0               | 26<br>0         | 26<br>6         | 0        |
| 09_7770B       | C_1<br>1        | UK          | 10_A<br>2    | 26<br>8         | 26<br>8         | 0               | 21<br>3         | 21<br>7         | 0               | 16<br>2         | 20<br>8         | 0               | 16<br>6         | 17<br>0         | 27<br>3         | 27<br>9         | 0               | 19<br>2         | 19<br>2         | 13<br>6         | 13<br>0         | 0            | 331           | 341             | 17<br>3         | 17<br>5         | 28<br>8         | 28<br>4         | 0               | 24<br>2         | 24<br>4         | 24<br>4         | 26<br>0         | 26<br>6         | 0        |
| 10_7814A       | C_1<br>2        | UK          | 23_A<br>1_3  | 26<br>6         | 26<br>8         | 27<br>0         | 21<br>3         | 21<br>7         | 0               | 14<br>2         | 15<br>6         | 20<br>6         | 17<br>0         | 17<br>0         | 27<br>0         | 27<br>9         | 0               | 19<br>2         | 19<br>2         | 13<br>6         | 21<br>0         | 0            | 331           | 341             | 17<br>3         | 17<br>5         | 28<br>8         | 29<br>4         | 29<br>6         | 24<br>4         | 24<br>4         | 0               | 26<br>0         | 26<br>6         | 0        |
| 10_7930C       | C_1<br>3        | UK          | 13_A<br>2_15 | 26<br>6         | 26<br>8         | 0               | 20<br>5         | 21<br>3         | 0               | 15<br>4         | 16<br>0         | 0               | 16<br>6         | 17<br>0         | 27<br>3         | 27<br>9         | 0               | 19<br>2         | 19<br>2         | 13<br>6         | 15<br>6         | 0            | 341           | 341             | 17<br>3         | 17<br>3         | 28<br>4         | 29<br>4         | 0               | 24<br>0         | 24<br>4         | 0               | 26<br>0         | 26<br>6         | 0        |
| 10_8058A       | C_1<br>4        | UK          | 2_A1         | 25<br>8         | 26<br>8         | 0               | 21<br>3         | 21<br>7         | 0               | 15<br>4         | 15<br>6         | 20<br>6         | 16<br>6         | 17<br>0         | 27<br>3         | 27<br>9         | 0               | 19<br>2         | 19<br>5         | 13<br>2         | 13<br>2         | 0            | 341           | 355             | 17<br>3         | 17<br>3         | 28<br>8         | 29<br>0         | 29<br>2         | 24<br>4         | 24<br>4         | 0               | 26<br>0         | 26<br>6         | 26<br>6  |
| C4             | C_1<br>5        | UK          | 5_A1         | 26<br>8         | 26<br>8         | 0               | 20<br>5         | 21<br>7         | 0               | 15<br>6         | 16<br>2         | 0               | 16<br>6         | 17<br>0         | 27<br>3         | 27<br>9         | 0               | 19<br>2         | 19<br>2         | 13<br>6         | 13<br>6         | 0            | 341           | 355             | 17<br>5         | 17<br>5         | 29<br>2         | 29<br>4         | 0               | 24<br>4         | 24<br>4         | 0               | 26<br>6         | 26<br>6         | 0        |

|                        |       |        |           |      |      |   |      |      |   |      |      |      |      |      |      |      |   |      |      |      |      |      |     |     |      |      |      |      |   |      |      |      |      |      |   |
|------------------------|-------|--------|-----------|------|------|---|------|------|---|------|------|------|------|------|------|------|---|------|------|------|------|------|-----|-----|------|------|------|------|---|------|------|------|------|------|---|
| EG_10_01_Nub1.1        | EG_01 | Egy pt | 13_A 2_5  | 26 6 | 26 8 | 0 | 20 5 | 21 3 | 0 | 15 4 | 16 0 | 16 4 | 16 6 | 17 0 | 27 3 | 27 9 | 0 | 19 2 | 19 2 | 13 6 | 15 4 | 0    | 341 | 341 | 17 3 | 17 3 | 28 4 | 29 4 | 0 | 24 0 | 24 4 | 0    | 26 0 | 26 6 | 0 |
| EG_10_02_Tam1.1        | EG_02 | Egy pt | 13_A 2_5  | 26 6 | 26 8 | 0 | 20 5 | 21 3 | 0 | 15 4 | 16 0 | 16 4 | 16 6 | 17 0 | 27 3 | 27 9 | 0 | 19 2 | 19 2 | 13 6 | 15 4 | 0    | 341 | 341 | 17 3 | 17 3 | 28 4 | 29 4 | 0 | 24 0 | 24 4 | 0    | 26 0 | 26 6 | 0 |
| EG_10_03_Men1.1        | EG_03 | Egy pt | 23_A 1_19 | 26 6 | 27 0 | 0 | 21 3 | 21 3 | 0 | 14 2 | 20 6 | 0    | 17 0 | 17 0 | 27 9 | 27 0 | 0 | 19 2 | 19 2 | 13 6 | 21 0 | 0    | 331 | 341 | 17 3 | 17 3 | 28 8 | 29 4 | 0 | 24 4 | 24 4 | 0    | 26 0 | 26 6 | 0 |
| EG_10_04_MEN2.1        | EG_04 | Egy pt | 23_A 1_15 | 26 6 | 26 8 | 0 | 21 3 | 21 7 | 0 | 15 2 | 21 0 | 0    | 17 0 | 17 0 | 27 9 | 27 0 | 0 | 19 2 | 19 2 | 13 6 | 21 0 | 0    | 331 | 341 | 17 3 | 17 5 | 28 8 | 29 4 | 0 | 24 4 | 24 4 | 0    | 26 0 | 26 6 | 0 |
| EG_10_05_Tam2.1S.F     | EG_05 | Egy pt | 13_A 2_5  | 26 6 | 26 8 | 0 | 20 5 | 21 3 | 0 | 15 4 | 16 0 | 16 4 | 16 6 | 17 0 | 27 3 | 27 9 | 0 | 19 2 | 19 2 | 13 6 | 15 4 | 0    | 341 | 341 | 17 3 | 17 3 | 28 4 | 29 4 | 0 | 24 0 | 24 4 | 0    | 26 0 | 26 6 | 0 |
| EG_10_06_Elk1.1        | EG_06 | Egy pt | misc      | 26 8 | 26 8 | 0 | 20 5 | 21 7 | 0 | 16 2 | 20 4 | 0    | 16 6 | 17 0 | 27 3 | 27 9 | 0 | 19 2 | 19 2 | 11 8 | 13 6 | 0    | 341 | 341 | 17 3 | 17 5 | 28 4 | 29 4 | 0 | 24 0 | 24 2 | 24 4 | 26 0 | 26 0 | 0 |
| EG_10_07_ELS1.1        | EG_07 | Egy pt | 23_A 1_4  | 26 6 | 26 8 | 0 | 21 3 | 21 7 | 0 | 14 2 | 15 6 | 20 6 | 17 0 | 17 0 | 27 9 | 27 0 | 0 | 19 2 | 19 2 | 13 6 | 21 0 | 0    | 331 | 341 | 17 3 | 17 5 | 28 8 | 29 4 | 0 | 24 4 | 24 4 | 0    | 26 0 | 26 6 | 0 |
| EG_10_08_Men3.1        | EG_08 | Egy pt | 23_A 1_15 | 26 6 | 26 8 | 0 | 21 3 | 21 7 | 0 | 15 2 | 21 0 | 0    | 17 0 | 17 0 | 27 9 | 27 0 | 0 | 19 2 | 19 2 | 13 6 | 21 0 | 0    | 331 | 341 | 17 3 | 17 5 | 28 8 | 29 4 | 0 | 24 4 | 24 4 | 0    | 26 0 | 26 6 | 0 |
| EG_10_09_Taw1.1        | EG_09 | Egy pt | 23_A 1_15 | 26 6 | 26 8 | 0 | 21 3 | 21 7 | 0 | 15 2 | 21 0 | 0    | 17 0 | 17 0 | 27 9 | 27 0 | 0 | 19 2 | 19 2 | 13 6 | 21 0 | 0    | 331 | 341 | 17 3 | 17 5 | 28 8 | 29 4 | 0 | 24 4 | 24 4 | 0    | 26 0 | 26 6 | 0 |
| EG_10_10_Men4.1        | EG_10 | Egy pt | 23_A 1_15 | 26 6 | 26 8 | 0 | 21 3 | 21 7 | 0 | 15 2 | 21 0 | 0    | 17 0 | 17 0 | 27 9 | 27 0 | 0 | 19 2 | 19 2 | 13 6 | 21 0 | 0    | 331 | 341 | 17 3 | 17 5 | 28 8 | 29 4 | 0 | 24 4 | 24 4 | 0    | 26 0 | 26 6 | 0 |
| EG_10_11_Tam3.1        | EG_11 | Egy pt | 23_A 1_15 | 26 6 | 26 8 | 0 | 21 3 | 21 7 | 0 | 15 2 | 21 0 | 0    | 17 0 | 17 0 | 27 9 | 27 0 | 0 | 19 2 | 19 2 | 13 6 | 21 0 | 0    | 331 | 341 | 17 3 | 17 5 | 28 8 | 29 4 | 0 | 24 4 | 24 4 | 0    | 26 0 | 26 6 | 0 |
| EG_10_12_Mah1.1        | EG_12 | Egy pt | 23_A 1_16 | 26 6 | 26 8 | 0 | 21 3 | 21 3 | 0 | 15 2 | 21 0 | 0    | 17 0 | 17 0 | 27 9 | 27 0 | 0 | 19 2 | 19 2 | 14 0 | 21 4 | 0    | 331 | 341 | 17 3 | 17 3 | 28 8 | 29 4 | 0 | 24 4 | 24 4 | 0    | 26 0 | 26 6 | 0 |
| EG_10_13_Men5.1        | EG_13 | Egy pt | 23_A 1_15 | 26 6 | 26 8 | 0 | 21 3 | 21 7 | 0 | 15 2 | 21 0 | 0    | 17 0 | 17 0 | 27 9 | 27 0 | 0 | 19 2 | 19 2 | 13 6 | 21 4 | 0    | 331 | 341 | 17 3 | 17 5 | 28 8 | 29 4 | 0 | 24 4 | 24 4 | 0    | 26 0 | 26 6 | 0 |
| EG_10_14_Els2.1        | EG_14 | Egy pt | 13_A 2_5  | 26 6 | 26 8 | 0 | 20 5 | 21 3 | 0 | 15 4 | 16 0 | 16 4 | 16 6 | 17 0 | 27 3 | 27 9 | 0 | 19 2 | 19 2 | 13 6 | 15 4 | 0    | 341 | 341 | 17 3 | 17 3 | 28 4 | 29 4 | 0 | 24 4 | 24 4 | 0    | 26 0 | 26 6 | 0 |
| EG_10_15_She1.1        | EG_15 | Egy pt | 13_A 2_43 | 26 6 | 26 8 | 0 | 20 5 | 21 3 | 0 | 15 4 | 16 0 | 16 4 | 16 6 | 17 0 | 27 3 | 27 9 | 0 | 19 2 | 19 2 | 13 6 | 15 6 | 0    | 341 | 341 | 17 3 | 17 3 | 28 4 | 29 4 | 0 | 24 4 | 24 4 | 0    | 26 0 | 26 6 | 0 |
| EG_10_16_KAL1.1-Tomato | EG_16 | Egy pt | 23_A 1_15 | 26 6 | 26 8 | 0 | 21 3 | 21 7 | 0 | 15 2 | 21 0 | 0    | 17 0 | 17 0 | 27 9 | 27 0 | 0 | 19 2 | 19 2 | 13 6 | 21 4 | 0    | 331 | 341 | 17 3 | 17 5 | 28 8 | 29 4 | 0 | 24 4 | 24 4 | 0    | 26 0 | 26 6 | 0 |
| EG_11_17_kom1.1        | EG_17 | Egy pt | 13_A 2_84 | 26 6 | 27 2 | 0 | 20 5 | 21 3 | 0 | 15 4 | 15 6 | 16 0 | 16 6 | 17 0 | 27 3 | 27 9 | 0 | 19 2 | 19 2 | 13 4 | 13 6 | 15 4 | 341 | 341 | 17 3 | 17 3 | 28 4 | 29 4 | 0 | 24 0 | 24 4 | 0    | 26 0 | 26 6 | 0 |
| EG_11_18_Elb2.1        | EG_18 | Egy pt | 13_A 2_84 | 26 6 | 27 2 | 0 | 20 5 | 21 3 | 0 | 15 4 | 15 6 | 16 0 | 16 6 | 17 0 | 27 3 | 27 9 | 0 | 19 2 | 19 2 | 13 4 | 13 6 | 15 4 | 341 | 341 | 17 3 | 17 3 | 28 4 | 29 4 | 0 | 24 0 | 24 4 | 0    | 26 0 | 26 6 | 0 |
| EG_11_19_Tam4.1        | EG_19 | Egy pt | 23_A 1_15 | 26 6 | 26 8 | 0 | 21 3 | 21 7 | 0 | 15 2 | 21 0 | 0    | 17 0 | 17 0 | 27 9 | 27 0 | 0 | 19 2 | 19 2 | 13 6 | 21 4 | 0    | 331 | 341 | 17 3 | 17 5 | 28 8 | 29 4 | 0 | 24 4 | 24 4 | 0    | 26 0 | 26 6 | 0 |
| EG_11_20_Men6.1        | EG_20 | Egy pt | 23_A 1_15 | 26 6 | 26 8 | 0 | 21 3 | 21 7 | 0 | 15 2 | 21 0 | 0    | 17 0 | 17 0 | 27 9 | 27 0 | 0 | 19 2 | 19 2 | 13 6 | 21 4 | 0    | 331 | 341 | 17 3 | 17 5 | 28 8 | 29 4 | 0 | 24 4 | 24 4 | 0    | 26 0 | 26 6 | 0 |
| EG_11_21_Men7.1S.F     | EG_21 | Egy pt | 13_A 2_5  | 26 6 | 26 8 | 0 | 20 5 | 21 3 | 0 | 15 4 | 16 0 | 16 4 | 16 6 | 17 0 | 27 3 | 27 9 | 0 | 19 2 | 19 2 | 13 6 | 15 4 | 0    | 341 | 341 | 17 3 | 17 3 | 28 4 | 29 4 | 0 | 24 0 | 24 4 | 0    | 26 0 | 26 6 | 0 |
| EG_11_22_Tam5.1        | EG_22 | Egy pt | 23_A 1_15 | 26 6 | 26 8 | 0 | 21 3 | 21 7 | 0 | 15 2 | 21 0 | 0    | 17 0 | 17 0 | 27 9 | 27 0 | 0 | 19 2 | 19 2 | 13 6 | 21 4 | 0    | 331 | 341 | 17 3 | 17 5 | 28 8 | 29 4 | 0 | 24 4 | 24 4 | 0    | 26 0 | 26 6 | 0 |
| EG_11_23_Tam6.1fta     | EG_23 | Egy pt | 23_A 1_15 | 26 6 | 26 8 | 0 | 21 3 | 21 7 | 0 | 15 2 | 21 0 | 0    | 17 0 | 17 0 | 27 9 | 27 0 | 0 | 19 2 | 19 2 | 13 6 | 21 4 | 0    | 331 | 341 | 17 3 | 17 5 | 28 8 | 29 4 | 0 | 24 4 | 24 4 | 0    | 26 0 | 26 6 | 0 |
| EG_11_24_Mah2.1        | EG_24 | Egy pt | 13_A 2_84 | 26 6 | 27 2 | 0 | 20 5 | 21 3 | 0 | 15 4 | 15 6 | 16 0 | 16 6 | 17 0 | 27 3 | 27 9 | 0 | 19 2 | 19 2 | 13 4 | 13 6 | 15 4 | 341 | 341 | 17 3 | 17 3 | 28 4 | 29 4 | 0 | 24 0 | 24 4 | 0    | 26 0 | 26 6 | 0 |
| EG_11_25_Men8.1        | EG_25 | Egy pt | 23_A 1_10 | 26 6 | 26 8 | 0 | 21 3 | 21 7 | 0 | 14 2 | 15 6 | 20 8 | 17 0 | 17 0 | 27 9 | 27 0 | 0 | 19 2 | 19 2 | 13 6 | 21 0 | 0    | 331 | 341 | 17 3 | 17 5 | 28 8 | 29 4 | 0 | 24 4 | 24 4 | 0    | 26 0 | 26 6 | 0 |
| EG_11_26_Men9.1        | EG_26 | Egy pt | 13_A 2_84 | 26 6 | 27 2 | 0 | 20 5 | 21 3 | 0 | 15 4 | 15 6 | 16 0 | 16 6 | 17 0 | 27 3 | 27 9 | 0 | 19 2 | 19 2 | 13 4 | 13 6 | 15 4 | 341 | 341 | 17 3 | 17 3 | 28 4 | 29 4 | 0 | 24 0 | 24 4 | 0    | 26 0 | 26 6 | 0 |
| EG_11_27_Men10.1       | EG_27 | Egy pt | 23_A 1_15 | 26 6 | 26 8 | 0 | 21 3 | 21 7 | 0 | 15 2 | 21 0 | 0    | 17 0 | 17 0 | 27 9 | 27 0 | 0 | 19 2 | 19 2 | 13 6 | 21 4 | 0    | 331 | 341 | 17 3 | 17 5 | 28 8 | 29 4 | 0 | 24 4 | 24 4 | 0    | 26 0 | 26 6 | 0 |
| EG_11_28_Tam7.1        | EG_28 | Egy pt | 23_A 1_15 | 26 6 | 26 8 | 0 | 21 3 | 21 7 | 0 | 15 2 | 21 0 | 0    | 17 0 | 17 0 | 27 9 | 27 0 | 0 | 19 2 | 19 2 | 13 6 | 21 4 | 0    | 331 | 341 | 17 3 | 17 5 | 28 8 | 29 4 | 0 | 24 4 | 24 4 | 0    | 26 0 | 26 6 | 0 |

|                      |       |        |           |      |      |      |      |      |   |      |      |      |      |      |      |      |      |      |      |      |      |     |     |      |      |      |      |      |      |      |      |      |      |      |   |
|----------------------|-------|--------|-----------|------|------|------|------|------|---|------|------|------|------|------|------|------|------|------|------|------|------|-----|-----|------|------|------|------|------|------|------|------|------|------|------|---|
| EG_11_31_ Bar1.1     | EG_31 | Egy pt | 23_A 1_13 | 26 6 | 26 8 | 27 0 | 21 3 | 21 7 | 0 | 14 2 | 15 6 | 21 0 | 17 0 | 17 0 | 27 0 | 27 9 | 0    | 19 2 | 19 2 | 13 6 | 13 6 | 0   | 331 | 341  | 17 3 | 17 5 | 28 8 | 29 4 | 0    | 24 4 | 24 4 | 0    | 26 0 | 26 6 | 0 |
| EG_11_32_ Tet1.1     | EG_32 | Egy pt | 23_A 1_14 | 26 6 | 26 8 | 27 0 | 21 3 | 21 7 | 0 | 14 2 | 15 6 | 21 0 | 17 0 | 17 0 | 27 0 | 27 9 | 0    | 19 2 | 19 2 | 14 2 | 21 0 | 0   | 331 | 341  | 17 3 | 17 5 | 28 8 | 29 4 | 0    | 24 4 | 24 4 | 0    | 26 0 | 26 6 | 0 |
| EG_11_34_ Kom2.1     | EG_34 | Egy pt | 23_A 1_15 | 26 6 | 26 8 | 27 0 | 21 3 | 21 7 | 0 | 15 6 | 21 0 | 0    | 17 0 | 17 0 | 27 0 | 27 9 | 0    | 19 2 | 19 2 | 13 6 | 21 4 | 0   | 331 | 341  | 17 3 | 17 5 | 28 8 | 29 4 | 0    | 24 4 | 24 4 | 0    | 26 0 | 26 6 | 0 |
| EG_11_36_ Men11.1    | EG_36 | Egy pt | 23_A 1_15 | 26 6 | 26 8 | 27 0 | 21 3 | 21 7 | 0 | 15 6 | 21 0 | 0    | 17 0 | 17 0 | 27 0 | 27 9 | 0    | 19 2 | 19 2 | 13 6 | 21 4 | 0   | 331 | 341  | 17 3 | 17 5 | 28 8 | 29 4 | 0    | 24 4 | 24 4 | 0    | 26 0 | 26 6 | 0 |
| EG_11_37_ Tam11.1    | EG_37 | Egy pt | 23_A 1_15 | 26 6 | 26 8 | 27 0 | 21 3 | 21 7 | 0 | 15 6 | 21 0 | 0    | 17 0 | 17 0 | 27 0 | 27 9 | 0    | 19 2 | 19 2 | 13 6 | 21 4 | 0   | 331 | 341  | 17 3 | 17 5 | 28 8 | 29 4 | 0    | 24 4 | 24 4 | 0    | 26 0 | 26 6 | 0 |
| EG_11_38_ Tam12.1    | EG_38 | Egy pt | 23_A 1_15 | 26 6 | 26 8 | 27 0 | 21 3 | 21 7 | 0 | 15 6 | 21 0 | 0    | 17 0 | 17 0 | 27 0 | 27 9 | 0    | 19 2 | 19 2 | 13 6 | 21 4 | 0   | 331 | 341  | 17 3 | 17 5 | 28 8 | 29 4 | 0    | 24 4 | 24 4 | 0    | 26 0 | 26 6 | 0 |
| EG_11_39_ TAM13.1    | EG_39 | Egy pt | 23_A 1_15 | 26 6 | 26 8 | 27 0 | 21 3 | 21 7 | 0 | 15 6 | 21 0 | 0    | 17 0 | 17 0 | 27 0 | 27 9 | 0    | 19 2 | 19 2 | 13 6 | 21 4 | 0   | 331 | 341  | 17 3 | 17 5 | 28 8 | 29 4 | 0    | 24 4 | 24 4 | 0    | 26 0 | 26 6 | 0 |
| EG_11_40_ Men12.1    | EG_40 | Egy pt | 23_A 1_17 | 26 8 | 27 0 | 0    | 21 3 | 21 7 | 0 | 15 6 | 21 0 | 0    | 17 0 | 17 0 | 27 0 | 27 9 | 0    | 19 2 | 19 2 | 13 6 | 21 4 | 0   | 331 | 341  | 17 3 | 17 5 | 28 8 | 29 4 | 0    | 24 4 | 24 4 | 0    | 26 0 | 26 6 | 0 |
| EG_11_41_ Tam14.1    | EG_41 | Egy pt | 23_A 1_15 | 26 6 | 26 8 | 27 0 | 21 3 | 21 7 | 0 | 15 6 | 21 0 | 0    | 17 0 | 17 0 | 27 0 | 27 9 | 0    | 19 2 | 19 2 | 13 6 | 21 4 | 0   | 331 | 341  | 17 3 | 17 5 | 28 8 | 29 4 | 0    | 24 4 | 24 4 | 0    | 26 0 | 26 6 | 0 |
| EG_11_43_ Tam16.1    | EG_43 | Egy pt | 23_A 1_15 | 26 6 | 26 8 | 27 0 | 21 3 | 21 7 | 0 | 15 6 | 21 0 | 0    | 17 0 | 17 0 | 27 0 | 27 9 | 0    | 19 2 | 19 2 | 13 6 | 21 4 | 0   | 331 | 341  | 17 3 | 17 5 | 28 8 | 29 4 | 0    | 24 4 | 24 4 | 0    | 26 0 | 26 6 | 0 |
| EG_11_44_ Tam17.1    | EG_44 | Egy pt | 23_A 1_15 | 26 6 | 26 8 | 27 0 | 21 3 | 21 7 | 0 | 15 6 | 21 0 | 0    | 17 0 | 17 0 | 27 0 | 27 9 | 0    | 19 2 | 19 2 | 13 6 | 21 4 | 0   | 331 | 341  | 17 3 | 17 5 | 28 8 | 29 4 | 0    | 24 4 | 24 4 | 0    | 26 0 | 26 6 | 0 |
| EG_11_45_ Tam18.1    | EG_45 | Egy pt | 23_A 1_15 | 26 6 | 26 8 | 27 0 | 21 3 | 21 7 | 0 | 15 6 | 21 0 | 0    | 17 0 | 17 0 | 27 0 | 27 9 | 0    | 19 2 | 19 2 | 13 6 | 21 4 | 0   | 331 | 341  | 17 3 | 17 5 | 28 8 | 29 4 | 0    | 24 4 | 24 4 | 0    | 26 0 | 26 6 | 0 |
| EG_11_46_ Men13.1    | EG_46 | Egy pt | 23_A 1_15 | 26 6 | 26 8 | 27 0 | 21 3 | 21 7 | 0 | 15 6 | 21 0 | 0    | 17 0 | 17 0 | 27 0 | 27 9 | 0    | 19 2 | 19 2 | 13 6 | 21 4 | 0   | 331 | 341  | 17 3 | 17 5 | 28 8 | 29 4 | 0    | 24 4 | 24 4 | 0    | 26 0 | 26 6 | 0 |
| EG_11_47_ Tam19.1    | EG_47 | Egy pt | 23_A 1_15 | 26 6 | 26 8 | 27 0 | 21 3 | 21 7 | 0 | 15 6 | 21 0 | 0    | 17 0 | 17 0 | 27 0 | 27 9 | 0    | 19 2 | 19 2 | 13 6 | 21 4 | 0   | 331 | 341  | 17 3 | 17 5 | 28 8 | 29 4 | 0    | 24 4 | 24 4 | 0    | 26 0 | 26 6 | 0 |
| EG_11_49_ Tam20.1    | EG_49 | Egy pt | 23_A 1_15 | 26 6 | 26 8 | 27 0 | 21 3 | 21 7 | 0 | 15 6 | 21 0 | 0    | 17 0 | 17 0 | 27 0 | 27 9 | 0    | 19 2 | 19 2 | 13 6 | 21 4 | 0   | 331 | 341  | 17 3 | 17 5 | 28 8 | 29 4 | 0    | 24 4 | 24 4 | 0    | 26 0 | 26 6 | 0 |
| EG_11_50_ Men15.1    | EG_50 | Egy pt | 23_A 1_15 | 26 6 | 26 8 | 27 0 | 21 3 | 21 7 | 0 | 15 6 | 21 0 | 0    | 17 0 | 17 0 | 27 0 | 27 9 | 0    | 19 2 | 19 2 | 13 6 | 21 4 | 0   | 331 | 341  | 17 3 | 17 5 | 28 8 | 29 4 | 0    | 24 4 | 24 4 | 0    | 26 0 | 26 6 | 0 |
| EG_11_51_ Nad1.1     | EG_51 | Egy pt | 23_A 1_12 | 26 6 | 26 8 | 27 0 | 21 3 | 21 7 | 0 | 14 2 | 15 6 | 21 0 | 17 0 | 17 0 | 27 0 | 27 9 | 0    | 19 2 | 19 2 | 13 6 | 21 0 | 0   | 331 | 341  | 17 3 | 17 5 | 28 8 | 29 4 | 0    | 24 4 | 24 4 | 0    | 26 0 | 26 6 | 0 |
| EG_11_52_ Men16.1    | EG_52 | Egy pt | 23_A 1_15 | 26 6 | 26 8 | 27 0 | 21 3 | 21 7 | 0 | 15 6 | 21 0 | 0    | 17 0 | 17 0 | 27 0 | 27 9 | 0    | 19 2 | 19 2 | 13 6 | 21 4 | 0   | 331 | 341  | 17 3 | 17 5 | 28 8 | 29 4 | 0    | 24 4 | 24 4 | 0    | 26 0 | 26 6 | 0 |
| EG_11_54_ Gez1.1     | EG_54 | Egy pt | 23_A 1_15 | 26 6 | 26 8 | 27 0 | 21 3 | 21 7 | 0 | 15 6 | 21 0 | 0    | 17 0 | 17 0 | 27 0 | 27 9 | 0    | 19 2 | 19 2 | 13 6 | 21 4 | 0   | 331 | 341  | 17 3 | 17 5 | 28 8 | 29 4 | 0    | 24 4 | 24 4 | 0    | 26 0 | 26 6 | 0 |
| EG_11_55_ Men18.1    | EG_55 | Egy pt | 23_A 1_15 | 26 6 | 26 8 | 27 0 | 21 3 | 21 7 | 0 | 15 6 | 21 0 | 0    | 17 0 | 17 0 | 27 0 | 27 9 | 0    | 19 2 | 19 2 | 13 6 | 21 4 | 0   | 331 | 341  | 17 3 | 17 5 | 28 8 | 29 4 | 0    | 24 4 | 24 4 | 0    | 26 0 | 26 6 | 0 |
| EG_11_56_ Men19.IS.F | EG_56 | Egy pt | 13_A 2_84 | 26 6 | 27 2 | 0    | 20 5 | 21 3 | 0 | 15 4 | 16 6 | 16 0 | 16 6 | 17 3 | 27 9 | 0    | 19 2 | 19 2 | 13 6 | 13 6 | 15 4 | 341 | 341 | 17 3 | 17 3 | 28 4 | 29 4 | 0    | 24 0 | 24 4 | 0    | 26 0 | 26 6 | 0    |   |
| EG_11_57_ MEN20.1    | EG_57 | Egy pt | 23_A 1_15 | 26 6 | 26 8 | 27 0 | 21 3 | 21 7 | 0 | 15 6 | 21 0 | 0    | 17 0 | 17 0 | 27 0 | 27 9 | 0    | 19 2 | 19 2 | 13 6 | 21 4 | 0   | 331 | 341  | 17 3 | 17 5 | 28 8 | 29 4 | 0    | 24 4 | 24 4 | 0    | 26 0 | 26 6 | 0 |
| EG_11_58_ Men21.1    | EG_58 | Egy pt | 23_A 1_15 | 26 6 | 26 8 | 27 0 | 21 3 | 21 7 | 0 | 15 6 | 21 0 | 0    | 17 0 | 17 0 | 27 0 | 27 9 | 0    | 19 2 | 19 2 | 13 6 | 21 4 | 0   | 331 | 341  | 17 3 | 17 5 | 28 8 | 29 4 | 0    | 24 4 | 24 4 | 0    | 26 0 | 26 6 | 0 |
| EG_11_60_ Men22.1    | EG_60 | Egy pt | 23_A 1_15 | 26 6 | 26 8 | 27 0 | 21 3 | 21 7 | 0 | 15 6 | 21 0 | 0    | 17 0 | 17 0 | 27 0 | 27 9 | 0    | 19 2 | 19 2 | 13 6 | 21 4 | 0   | 331 | 341  | 17 3 | 17 5 | 28 8 | 29 4 | 0    | 24 4 | 24 4 | 0    | 26 0 | 26 6 | 0 |
| EG_11_61_ Men23.IS.F | EG_61 | Egy pt | 13_A 2_84 | 26 6 | 27 2 | 0    | 20 5 | 21 3 | 0 | 15 4 | 16 6 | 16 0 | 16 6 | 17 3 | 27 9 | 0    | 19 2 | 19 2 | 13 6 | 13 6 | 15 4 | 341 | 341 | 17 3 | 17 3 | 28 4 | 29 4 | 0    | 24 0 | 24 4 | 0    | 26 0 | 26 6 | 0    |   |
| EG_11_62_ Men23.2    | EG_62 | Egy pt | 13_A 2_84 | 26 6 | 27 2 | 0    | 20 5 | 21 3 | 0 | 15 4 | 16 6 | 16 0 | 16 6 | 17 3 | 27 9 | 0    | 19 2 | 19 2 | 13 6 | 13 6 | 15 4 | 341 | 341 | 17 3 | 17 3 | 28 4 | 29 4 | 0    | 24 0 | 24 4 | 0    | 26 0 | 26 6 | 0    |   |
| EG_11_63_ Men24.1    | EG_63 | Egy pt | 23_A 1_15 | 26 6 | 26 8 | 27 0 | 21 3 | 21 7 | 0 | 15 6 | 21 0 | 0    | 17 0 | 17 0 | 27 0 | 27 9 | 0    | 19 2 | 19 2 | 13 6 | 21 4 | 0   | 331 | 341  | 17 3 | 17 5 | 28 8 | 29 4 | 0    | 24 4 | 24 4 | 0    | 26 0 | 26 6 | 0 |
| EG_11_64_ Men25.1    | EG_64 | Egy pt | 13_A 2_84 | 26 6 | 27 2 | 0    | 20 5 | 21 3 | 0 | 15 4 | 16 6 | 16 0 | 16 6 | 17 3 | 27 9 | 0    | 19 2 | 19 2 | 13 6 | 13 6 | 15 4 | 341 | 341 | 17 3 | 17 3 | 28 4 | 29 4 | 0    | 24 0 | 24 4 | 0    | 26 0 | 26 6 | 0    |   |



|                    |       |        |           |      |      |      |      |      |   |      |       |      |      |       |      |      |      |       |       |      |      |     |     |      |      |      |      |      |      |      |      |       |       |      |   |
|--------------------|-------|--------|-----------|------|------|------|------|------|---|------|-------|------|------|-------|------|------|------|-------|-------|------|------|-----|-----|------|------|------|------|------|------|------|------|-------|-------|------|---|
| EG_11_65_Men26.1   | EG_65 | Egy pt | 23_A 1_12 | 26 6 | 26 8 | 27 0 | 21 3 | 21 7 | 0 | 14 2 | 15 6  | 21 0 | 17 0 | 17 0  | 27 0 | 27 9 | 0    | 19 2  | 19 2  | 13 6 | 21 0 | 0   | 331 | 341  | 17 3 | 17 5 | 28 8 | 29 4 | 0    | 24 4 | 24 4 | 0     | 26 0  | 26 6 | 0 |
| EG_11_67_Nad2.1    | EG_67 | Egy pt | 23_A 1_15 | 26 6 | 26 8 | 27 0 | 21 3 | 21 7 | 0 | 15 6 | 21 0  | 0    | 17 0 | 17 0  | 27 0 | 27 9 | 0    | 19 2  | 19 13 | 13 6 | 21 4 | 0   | 331 | 341  | 17 3 | 17 5 | 28 8 | 29 4 | 0    | 24 4 | 24 4 | 0     | 26 0  | 26 6 | 0 |
| EG_11_68_MEN27.1sf | EG_68 | Egy pt | 13_A 2_84 | 26 6 | 27 2 | 0    | 20 5 | 21 3 | 0 | 15 4 | 15 16 | 16 6 | 16 7 | 17 27 | 27 9 | 0    | 19 2 | 19 2  | 13 13 | 15 4 | 0    | 341 | 341 | 17 3 | 17 3 | 28 4 | 29 4 | 0    | 24 0 | 24 4 | 0    | 26 26 | 26 6  | 0    |   |
| EG_11_69_Men28.1   | EG_69 | Egy pt | 23_A 1_15 | 26 6 | 26 8 | 27 0 | 21 3 | 21 7 | 0 | 15 6 | 21 0  | 0    | 17 0 | 17 0  | 27 0 | 27 9 | 0    | 19 2  | 19 2  | 13 6 | 21 0 | 0   | 331 | 341  | 17 3 | 17 5 | 28 8 | 29 4 | 0    | 24 4 | 24 4 | 0     | 26 0  | 26 6 | 0 |
| EG_11_70_Fes1.1    | EG_70 | Egy pt | 13_A 2_84 | 26 6 | 27 2 | 0    | 20 5 | 21 3 | 0 | 15 4 | 15 16 | 16 6 | 16 7 | 17 27 | 27 9 | 0    | 19 2 | 19 2  | 13 4  | 13 6 | 15 4 | 0   | 341 | 341  | 17 3 | 17 3 | 28 4 | 29 4 | 0    | 24 0 | 24 4 | 0     | 26 26 | 26 6 | 0 |
| EG_11_72_Men29.1   | EG_72 | Egy pt | 23_A 1_12 | 26 6 | 26 8 | 27 0 | 21 3 | 21 7 | 0 | 14 2 | 15 6  | 21 0 | 17 0 | 17 0  | 27 0 | 27 9 | 0    | 19 2  | 19 2  | 13 6 | 21 0 | 0   | 331 | 341  | 17 3 | 17 5 | 28 8 | 29 4 | 0    | 24 4 | 24 4 | 0     | 26 0  | 26 6 | 0 |
| EG_11_73_Men30.1   | EG_73 | Egy pt | 23_A 1_15 | 26 6 | 26 8 | 27 0 | 21 3 | 21 7 | 0 | 15 6 | 21 0  | 0    | 17 0 | 17 0  | 27 0 | 27 9 | 0    | 19 2  | 19 13 | 13 6 | 21 4 | 0   | 331 | 341  | 17 3 | 17 5 | 28 8 | 29 4 | 0    | 24 4 | 24 4 | 0     | 26 26 | 26 6 | 0 |
| EG_11_74_Kam1.1    | EG_74 | Egy pt | 23_A 1_15 | 26 6 | 26 8 | 27 0 | 21 3 | 21 7 | 0 | 15 6 | 21 0  | 0    | 17 0 | 17 0  | 27 0 | 27 9 | 0    | 19 2  | 19 2  | 13 6 | 21 4 | 0   | 331 | 341  | 17 3 | 17 5 | 28 8 | 29 4 | 0    | 24 4 | 24 4 | 0     | 26 0  | 26 6 | 0 |
| EG_11_75_Ham1.1    | EG_75 | Egy pt | 23_A 1_18 | 26 6 | 27 0 | 0    | 21 3 | 21 7 | 0 | 15 6 | 21 0  | 0    | 17 0 | 17 0  | 27 0 | 27 9 | 0    | 19 2  | 19 2  | 13 6 | 21 4 | 0   | 331 | 341  | 17 3 | 17 5 | 28 8 | 29 4 | 0    | 24 4 | 24 4 | 0     | 26 26 | 26 6 | 0 |
| EG_11_76_Bos1.Sf   | EG_76 | Egy pt | 13_A 2_84 | 26 6 | 27 2 | 0    | 20 5 | 21 3 | 0 | 15 4 | 15 16 | 16 6 | 16 7 | 17 27 | 27 9 | 0    | 19 2 | 19 2  | 13 13 | 15 4 | 0    | 341 | 341 | 17 3 | 17 3 | 28 4 | 29 4 | 0    | 24 0 | 24 4 | 0    | 26 26 | 26 6  | 0    |   |
| EG_11_77_Bos1.2    | EG_77 | Egy pt | 13_A 2_84 | 26 6 | 27 2 | 0    | 20 5 | 21 3 | 0 | 15 4 | 15 16 | 16 6 | 16 7 | 17 27 | 27 9 | 0    | 19 2 | 19 2  | 13 13 | 15 4 | 0    | 341 | 341 | 17 3 | 17 3 | 28 4 | 29 4 | 0    | 24 0 | 24 4 | 0    | 26 26 | 26 6  | 0    |   |
| EG_11_78_Men31.1   | EG_78 | Egy pt | 23_A 1_15 | 26 6 | 26 8 | 27 0 | 21 3 | 21 7 | 0 | 15 6 | 21 0  | 0    | 17 0 | 17 0  | 27 0 | 27 9 | 0    | 19 2  | 19 13 | 13 6 | 21 4 | 0   | 331 | 341  | 17 3 | 17 5 | 28 8 | 29 4 | 0    | 24 4 | 24 4 | 0     | 26 26 | 26 6 | 0 |
| EG_11_79_Men31.2   | EG_79 | Egy pt | 23_A 1_15 | 26 6 | 26 8 | 27 0 | 21 3 | 21 7 | 0 | 15 6 | 21 0  | 0    | 17 0 | 17 0  | 27 0 | 27 9 | 0    | 19 2  | 19 13 | 13 6 | 21 4 | 0   | 331 | 341  | 17 3 | 17 5 | 28 8 | 29 4 | 0    | 24 4 | 24 4 | 0     | 26 26 | 26 6 | 0 |
| EG_11_80_Ham1.2    | EG_80 | Egy pt | 23_A 1_15 | 26 6 | 26 8 | 27 0 | 21 3 | 21 7 | 0 | 15 6 | 21 0  | 0    | 17 0 | 17 0  | 27 0 | 27 9 | 0    | 19 2  | 19 13 | 13 6 | 21 4 | 0   | 331 | 341  | 17 3 | 17 5 | 28 8 | 29 4 | 0    | 24 4 | 24 4 | 0     | 26 26 | 26 6 | 0 |
| EG_11_81_Kam2.1    | EG_81 | Egy pt | 13_A 2_84 | 26 6 | 27 2 | 0    | 20 5 | 21 3 | 0 | 15 4 | 15 16 | 16 6 | 16 7 | 17 27 | 27 9 | 0    | 19 2 | 19 2  | 13 13 | 15 4 | 0    | 341 | 341 | 17 3 | 17 3 | 28 4 | 29 4 | 0    | 24 0 | 24 4 | 0    | 26 26 | 26 6  | 0    |   |
| EG_11_82_Tam21.1   | EG_82 | Egy pt | 23_A 1_12 | 26 6 | 26 8 | 27 0 | 21 3 | 21 7 | 0 | 14 2 | 15 6  | 21 0 | 17 0 | 17 0  | 27 0 | 27 9 | 0    | 19 2  | 19 13 | 13 6 | 21 0 | 0   | 331 | 341  | 17 3 | 17 5 | 28 8 | 29 4 | 0    | 24 4 | 24 4 | 0     | 26 26 | 26 6 | 0 |
| EG_11_83_Sha1.1    | EG_83 | Egy pt | 13_A 2_84 | 26 6 | 27 2 | 0    | 20 5 | 21 3 | 0 | 15 4 | 15 16 | 16 6 | 16 7 | 17 27 | 27 9 | 0    | 19 2 | 19 2  | 13 13 | 15 4 | 0    | 341 | 341 | 17 3 | 17 3 | 28 4 | 29 4 | 0    | 24 0 | 24 4 | 0    | 26 26 | 26 6  | 0    |   |
| EG_11_84_Tam22.1   | EG_84 | Egy pt | 13_A 2_84 | 26 6 | 27 2 | 0    | 20 5 | 21 3 | 0 | 15 4 | 15 16 | 16 6 | 16 7 | 17 27 | 27 9 | 0    | 19 2 | 19 13 | 13 6  | 15 4 | 0    | 341 | 341 | 17 3 | 17 3 | 28 4 | 29 4 | 0    | 24 0 | 24 4 | 0    | 26 26 | 26 6  | 0    |   |
| EG_11_86_TAM24.1   | EG_86 | Egy pt | 23_A 1_12 | 26 6 | 26 8 | 27 0 | 21 3 | 21 7 | 0 | 14 2 | 16 21 | 0    | 17 0 | 17 0  | 27 0 | 27 9 | 0    | 19 2  | 19 13 | 13 6 | 21 0 | 0   | 331 | 341  | 17 3 | 17 5 | 28 8 | 29 4 | 0    | 24 4 | 24 4 | 0     | 26 26 | 26 6 | 0 |
| EG_11_87_Men32.1   | EG_87 | Egy pt | 23_A 1_15 | 26 6 | 26 8 | 27 0 | 21 3 | 21 7 | 0 | 15 6 | 21 0  | 0    | 17 0 | 17 0  | 27 0 | 27 9 | 0    | 19 2  | 19 13 | 13 6 | 21 4 | 0   | 331 | 341  | 17 3 | 17 5 | 28 8 | 29 4 | 0    | 24 4 | 24 4 | 0     | 26 26 | 26 6 | 0 |
| EG_11_88_Tam25.1Sf | EG_88 | Egy pt | 13_A 2_84 | 26 6 | 27 2 | 0    | 20 5 | 21 3 | 0 | 15 4 | 15 16 | 16 6 | 16 7 | 17 27 | 27 9 | 0    | 19 2 | 19 2  | 13 13 | 15 4 | 0    | 341 | 341 | 17 3 | 17 3 | 28 4 | 29 4 | 0    | 24 0 | 24 4 | 0    | 26 26 | 26 6  | 0    |   |
| EG_11_89_Sak1.1    | EG_89 | Egy pt | 23_A 1_12 | 26 6 | 26 8 | 27 0 | 21 3 | 21 7 | 0 | 14 2 | 15 6  | 21 0 | 17 0 | 17 0  | 27 0 | 27 9 | 0    | 19 2  | 19 2  | 13 6 | 21 0 | 0   | 331 | 341  | 17 3 | 17 5 | 28 8 | 29 4 | 0    | 24 4 | 24 4 | 0     | 26 26 | 26 6 | 0 |
| EG_11_90_MAH3.1    | EG_90 | Egy pt | 13_A 2_84 | 26 6 | 27 2 | 0    | 20 5 | 21 3 | 0 | 15 4 | 15 16 | 16 6 | 16 7 | 17 27 | 27 9 | 0    | 19 2 | 19 2  | 13 13 | 15 4 | 0    | 341 | 341 | 17 3 | 17 3 | 28 4 | 29 4 | 0    | 24 0 | 24 4 | 0    | 26 26 | 26 6  | 0    |   |
| EG_12_91_SAK2.1    | EG_91 | Egy pt | 13_A 2_84 | 26 6 | 27 2 | 0    | 20 5 | 21 3 | 0 | 15 4 | 15 16 | 16 6 | 16 7 | 17 27 | 27 9 | 0    | 19 2 | 19 2  | 13 13 | 15 4 | 0    | 341 | 341 | 17 3 | 17 3 | 28 4 | 29 4 | 0    | 24 0 | 24 4 | 0    | 26 26 | 26 6  | 0    |   |
| EG_12_92_MAH4.1    | EG_92 | Egy pt | 13_A 2_84 | 26 6 | 27 2 | 0    | 20 5 | 21 3 | 0 | 15 4 | 15 16 | 16 6 | 16 7 | 17 27 | 27 9 | 0    | 19 2 | 19 13 | 13 6  | 15 4 | 0    | 341 | 341 | 17 3 | 17 3 | 28 4 | 29 4 | 0    | 24 0 | 24 4 | 0    | 26 26 | 26 6  | 0    |   |
| EG_12_93_MAH5.1    | EG_93 | Egy pt | 13_A 2_84 | 26 6 | 27 2 | 0    | 20 5 | 21 3 | 0 | 15 4 | 15 16 | 16 6 | 16 7 | 17 27 | 27 9 | 0    | 19 2 | 19 2  | 13 13 | 15 4 | 0    | 341 | 341 | 17 3 | 17 3 | 28 4 | 29 4 | 0    | 24 0 | 24 4 | 0    | 26 26 | 26 6  | 0    |   |
| EG_12_94_MAH6.1sf  | EG_94 | Egy pt | 13_A 2_84 | 26 6 | 27 2 | 0    | 20 5 | 21 3 | 0 | 15 4 | 15 16 | 16 6 | 16 7 | 17 27 | 27 9 | 0    | 19 2 | 19 2  | 13 13 | 15 4 | 0    | 341 | 341 | 17 3 | 17 3 | 28 4 | 29 4 | 0    | 24 0 | 24 4 | 0    | 26 26 | 26 6  | 0    |   |
| EG_12_95_SAK3.1    | EG_95 | Egy pt | 13_A 2_84 | 26 6 | 27 2 | 0    | 20 5 | 21 3 | 0 | 15 4 | 15 16 | 16 6 | 16 7 | 17 27 | 27 9 | 0    | 19 2 | 19 2  | 13 13 | 15 4 | 0    | 341 | 341 | 17 3 | 17 3 | 28 4 | 29 4 | 0    | 24 0 | 24 4 | 0    | 26 26 | 26 6  | 0    |   |

|                     |           |           |              |         |         |   |         |         |   |         |         |         |         |         |         |         |   |         |         |         |         |         |     |     |         |         |         |         |   |         |         |   |         |         |   |
|---------------------|-----------|-----------|--------------|---------|---------|---|---------|---------|---|---------|---------|---------|---------|---------|---------|---------|---|---------|---------|---------|---------|---------|-----|-----|---------|---------|---------|---------|---|---------|---------|---|---------|---------|---|
| EG_12_96_<br>MAH7.1 | EG<br>_96 | Egy<br>pt | 13_A<br>2_84 | 26<br>6 | 27<br>2 | 0 | 20<br>5 | 21<br>3 | 0 | 15<br>4 | 15<br>6 | 16<br>0 | 16<br>6 | 17<br>0 | 27<br>3 | 27<br>9 | 0 | 19<br>2 | 19<br>2 | 13<br>4 | 13<br>6 | 15<br>4 | 341 | 341 | 17<br>3 | 17<br>3 | 28<br>4 | 29<br>4 | 0 | 24<br>0 | 24<br>4 | 0 | 26<br>0 | 26<br>6 | 0 |
| FDate33d            | C_<br>1   | UK        | 1_A1         | 26<br>6 | 26<br>8 | 0 | 21<br>3 | 21<br>7 | 0 | 14<br>2 | 16<br>2 | 0       | 16<br>6 | 17<br>0 | 27<br>0 | 27<br>9 | 0 | 19<br>2 | 19<br>2 | 13<br>6 | 13<br>6 | 0       | 341 | 355 | 17<br>3 | 17<br>5 | 28<br>4 | 29<br>4 | 0 | 24<br>4 | 24<br>4 | 0 | 26<br>0 | 26<br>6 | 0 |
| PCL_10_80<br>70B    | C_<br>2   | UK        | 13_A<br>2_87 | 26<br>6 | 27<br>2 | 0 | 20<br>5 | 21<br>3 | 0 | 15<br>4 | 15<br>6 | 16<br>0 | 16<br>6 | 17<br>0 | 27<br>3 | 27<br>9 | 0 | 19<br>2 | 19<br>2 | 13<br>6 | 15<br>4 | 0       | 341 | 341 | 17<br>3 | 17<br>3 | 28<br>4 | 29<br>4 | 0 | 24<br>0 | 24<br>4 | 0 | 26<br>0 | 26<br>6 | 0 |
